# Supplementary material for: Yb14MgBi11: structure, thermoelectric properties and the effect of the structure on low lattice thermal conductivity
Source: Royal Society of Chemistry journal article supplement (doi:10.1039/c7dt00183e), 2017-01-01
Supplement: c7dt00183e1.pdf [file c7dt00183e1.pdf]

## **Yb<sub>14</sub>MgBi<sub>11</sub>: Structure, Thermoelectric Properties and the Effect of Structure on Low Lattice Thermal Conductivity**

Yufei Hu and Susan M. Kauzlarich\*

Chemistry Department, One Shields Avenue, University of California, Davis, USA 95616

### **Supporting Information**

#### **List of Tables and Figures**

|                 |                                                                                                                                                                                      |
|-----------------|--------------------------------------------------------------------------------------------------------------------------------------------------------------------------------------|
| <b>STable 1</b> | Measured thermal diffusivity, calculated density, calculated specific heat and thermal conductivity of Yb <sub>14</sub> MgBi <sub>11</sub> and Yb <sub>14</sub> MnBi <sub>11</sub> . |
|-----------------|--------------------------------------------------------------------------------------------------------------------------------------------------------------------------------------|

**Stable 1.** Measured Thermal Diffusivity, Calculated Density, Calculated Specific Heat and Thermal Conductivity of Yb<sub>14</sub>MgBi<sub>11</sub> and Yb<sub>14</sub>MnBi<sub>11</sub>.

| Temperature (K)                     | Diffusivity (mm <sup>2</sup> /s) | Density (g*cm <sup>-3</sup> ) <sup>a</sup> | Specific Heat (J*K <sup>-1</sup> *g <sup>-1</sup> ) <sup>b</sup> | Thermal conductivity (W*m <sup>-1</sup> *K <sup>-1</sup> ) |
|-------------------------------------|----------------------------------|--------------------------------------------|------------------------------------------------------------------|------------------------------------------------------------|
| Yb <sub>14</sub> MgBi <sub>11</sub> |                                  |                                            |                                                                  |                                                            |
| 300.5                               | 1.163                            | 9.559                                      | 0.1263                                                           | 1.40                                                       |
| 372.8                               | 1.264                            | 9.522                                      | 0.1286                                                           | 1.55                                                       |
| 472.7                               | 1.350                            | 9.470                                      | 0.1318                                                           | 1.69                                                       |
| 573.7                               | 1.409                            | 9.419                                      | 0.1351                                                           | 1.79                                                       |
| 672.7                               | 1.428                            | 9.369                                      | 0.1383                                                           | 1.85                                                       |
| 773.7                               | 1.416                            | 9.319                                      | 0.1415                                                           | 1.87                                                       |
| 873.4                               | 1.417                            | 9.269                                      | 0.1447                                                           | 1.90                                                       |
| Yb <sub>14</sub> MnBi <sub>11</sub> |                                  |                                            |                                                                  |                                                            |
| 298.2                               | 1.042                            | 9.727                                      | 0.1254                                                           | 1.27                                                       |
| 372.9                               | 1.152                            | 9.688                                      | 0.1278                                                           | 1.43                                                       |
| 471.5                               | 1.256                            | 9.637                                      | 0.1309                                                           | 1.58                                                       |
| 575.5                               | 1.344                            | 9.583                                      | 0.1343                                                           | 1.73                                                       |
| 676.1                               | 1.389                            | 9.531                                      | 0.1375                                                           | 1.82                                                       |
| 775.0                               | 1.393                            | 9.481                                      | 0.1406                                                           | 1.86                                                       |
| 874.3                               | 1.426                            | 9.431                                      | 0.1438                                                           | 1.93                                                       |

a. Density is calculated using the room temperature density and thermal expansion data from Ref[45]. The equation used in calculation is:

$$Density = \frac{Room\ temperature\ density}{[1 + 0.000018 * (Temperature - 300)]^3}$$

0.000018 is the thermal expansion ratio per K for Yb<sub>14</sub>MnSb<sub>11</sub> and 300 K is the room temperature.

b. Specific heat is calculated using data from Ref[36], adjusted by molecular masses of compounds.

$$Specific\ heat = \frac{Molecular\ mass\ of\ Yb_{14}MnSb_{11}}{Molecular\ mass\ of\ sample} \times Specific\ Heat\ of\ Yb_{14}MnSb_{11}$$

$$Specific\ Heat\ of\ Yb_{14}MnSb_{11} = 0.145 + 0.00004 \times Temperature$$
